# Supplementary material for: Mesoscale assembly of chemically modified graphene into complex cellular networks
Source: PubMed Central journal article supplement (PMC4102120; doi:10.1038/ncomms5328), 2014-07-07
Supplement: ncomms5328-s1.pdf [file ncomms5328-s1.pdf]

## Supplementary Figures

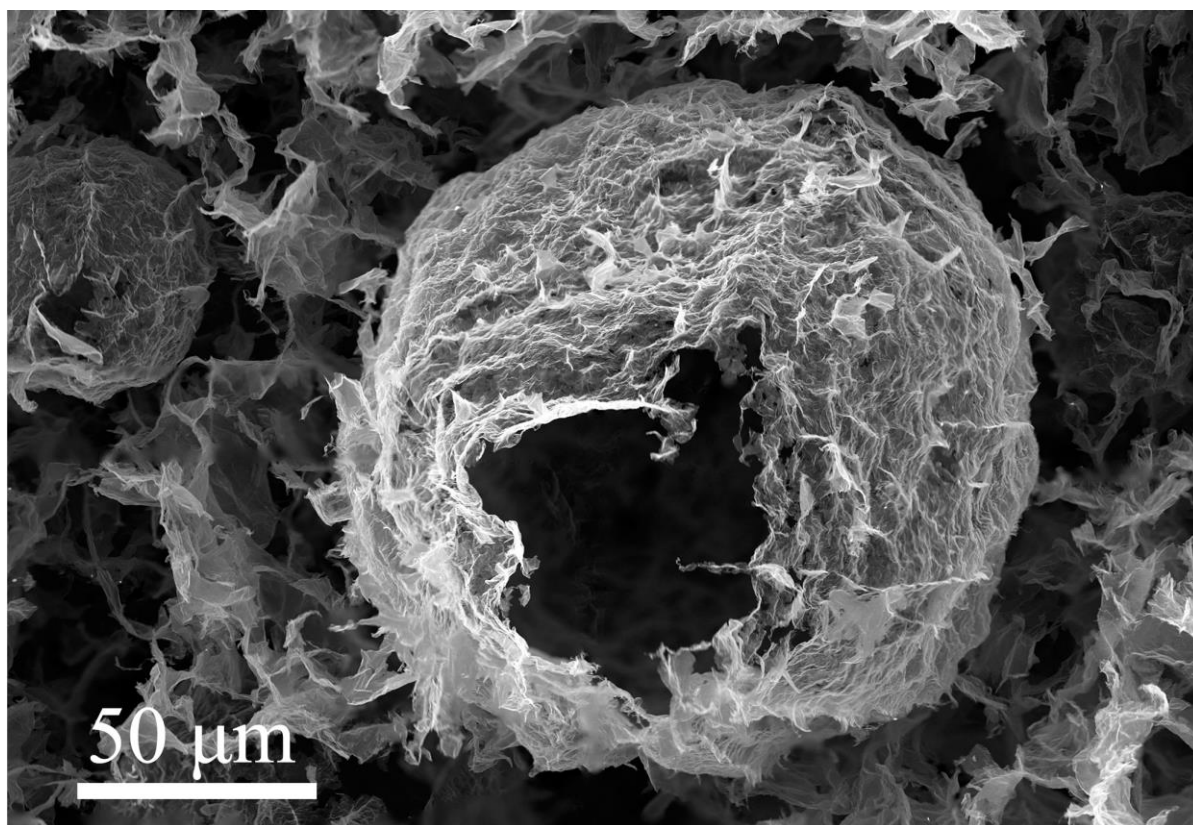

**Supplementary Figure 1: SEM image of a spherically shaped closed cell encapsulated by CMG flakes.** CMG segregates to the oil/water interface during emulsification, stabilizing spherically shaped emulsion oil droplets that after freeze drying will lead to cell covered by CMG flakes in the CMG-CNs.

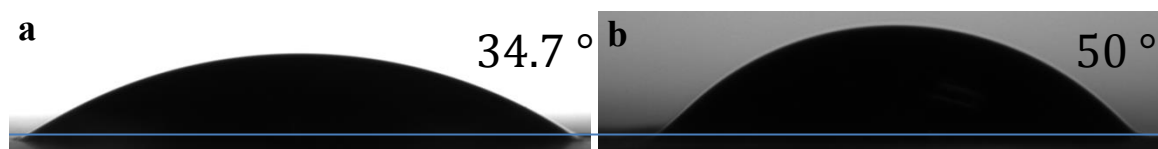

**Supplementary Figure 2: Contact angle of water on GO films without (a) and with the addition of PVA (b).** PVA molecules adsorbed on GO flakes reduce the contact angle of water by 15 ° indicating a change of wettability for GO.

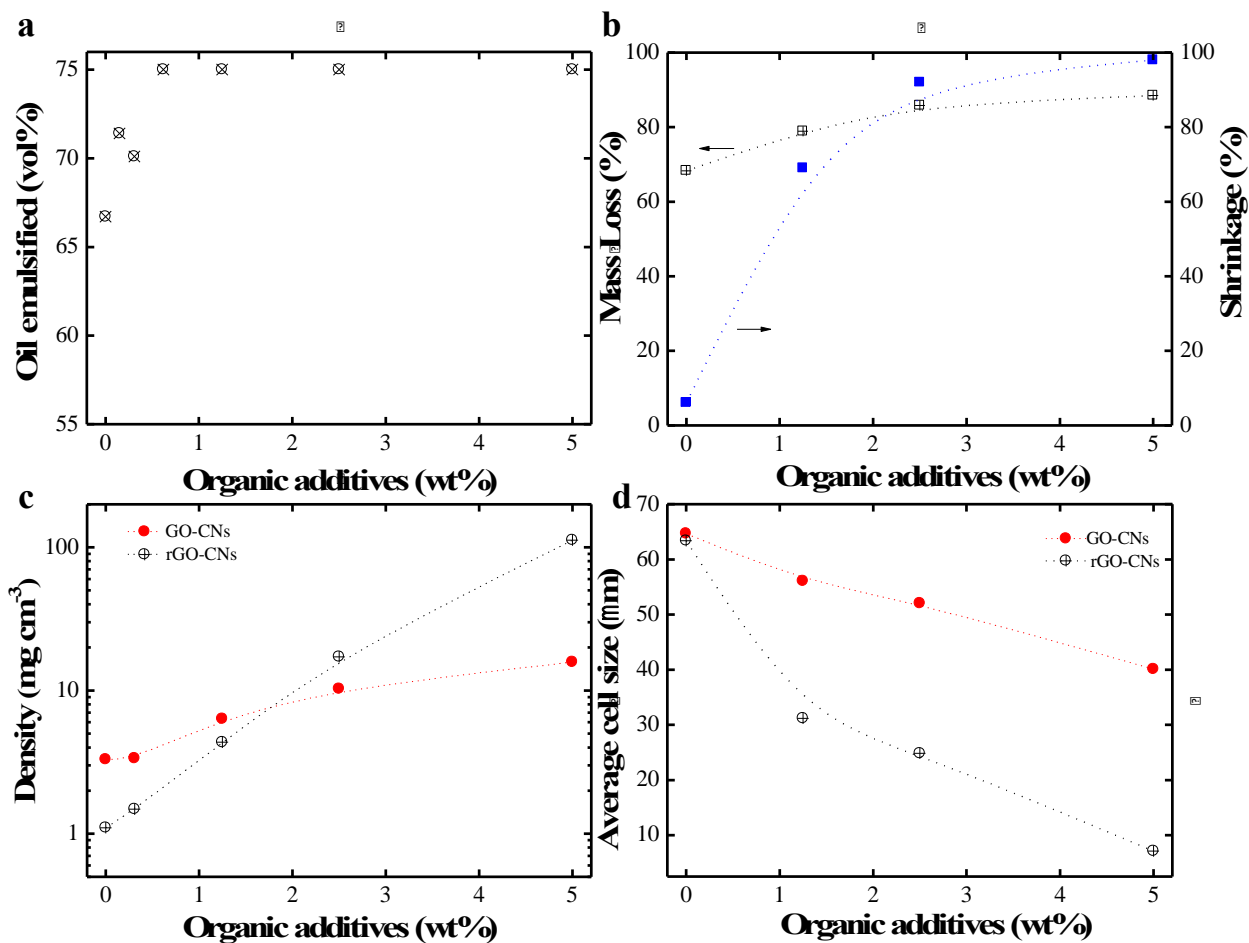

**Supplementary Figure 3: Processing and structural characterization of GO- and rGO-CNs as a function of additives. a.** Maximum amount of oil emulsified in the GO-sus in order to get GO-em; **b.** mass loss and shrinkage of GO-CNs upon thermal annealing at 1000 °C in Ar/H<sub>2</sub> atmosphere; **c.** Density and **d.** Average cell size ( $d_{50}$ ) of the resulted GO and rGO-CNs. The organic additives (PVA: sucrose in 1:1 wt%) are added to the GO-sus with 0.65wt% GO.

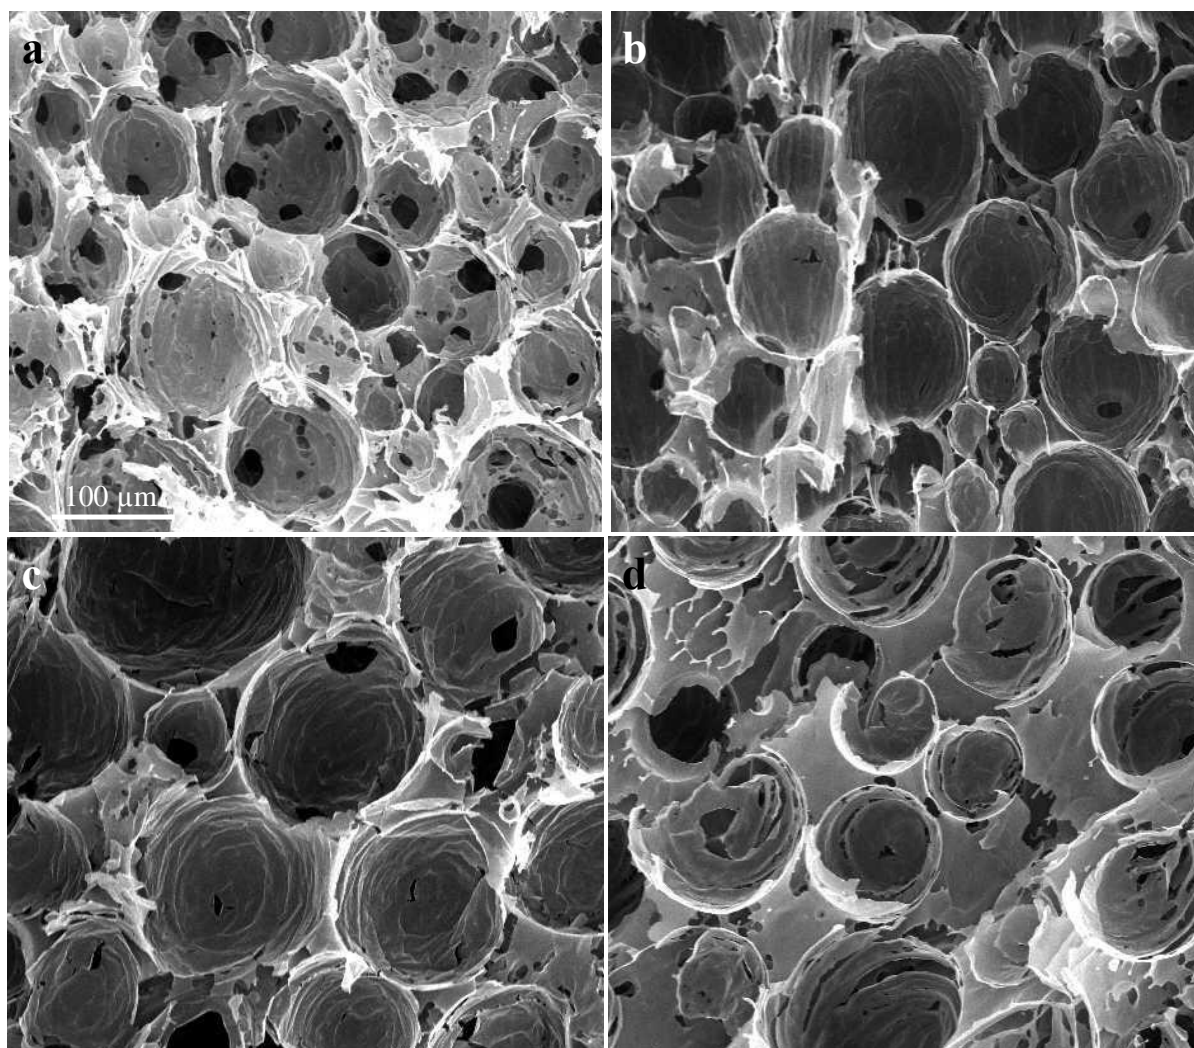

Supplementary Figure 4: **Effect of organic additives sucrose and PVA on the CMG-CN cell wall topography.** GO-CNs produced from suspensions containing 0.65 wt% GO and 1.2 wt% organics, with different proportions of PVA:sucrose: 3:1 (**a**), 1:1 (**b**) and 1:3 (**c**) or with 5 wt% organics (sucrose) (**d**). Scale bar for all figures in **a**.

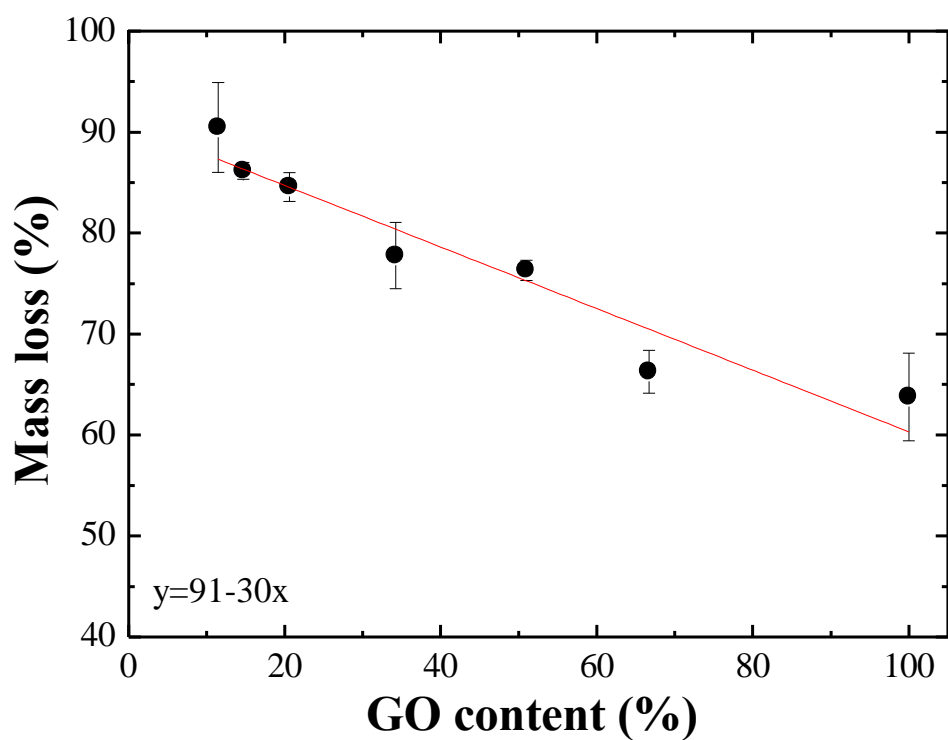

**Supplementary Figure 5: Mass loss during reduction at 1000 °C in Ar/H<sub>2</sub> atmosphere versus proportion of GO in the GO-CNs.** GO content with regards to total amount of solids, i.e. GO and organic additives. The linear fit indicates that 0.91% of the binder is eliminated during the thermal treatment.

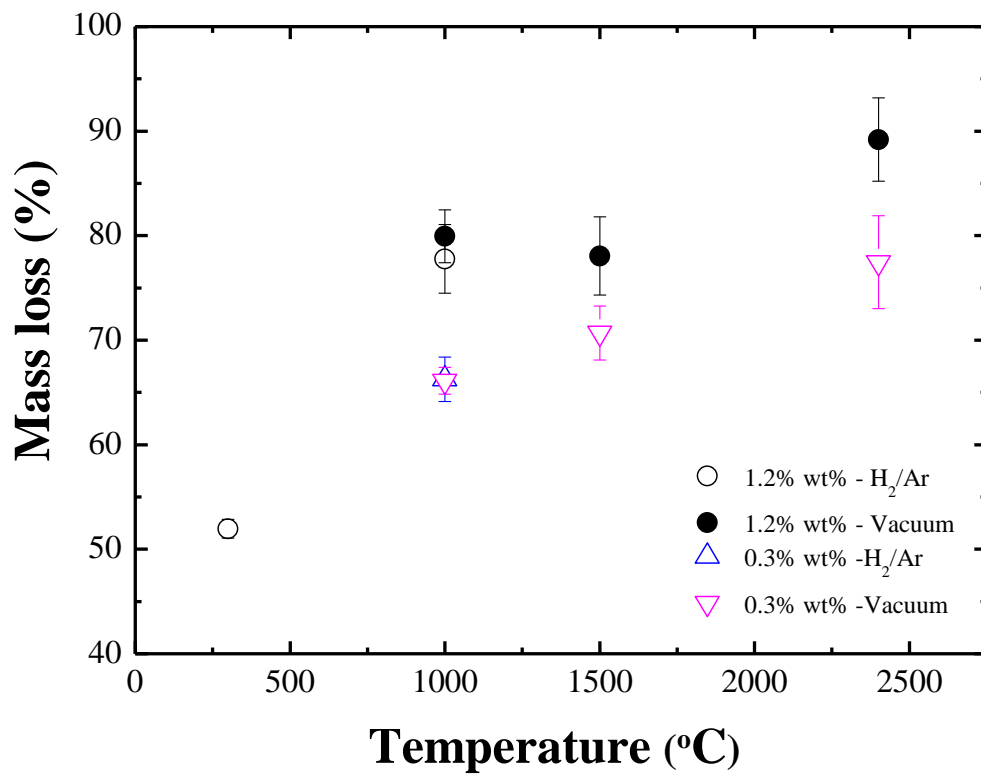

**Supplementary Figure 6:** Proportion of mass loss during thermal treatment at different temperatures for CMG-CNs produced with 0.3 and 1.2 wt% binders.

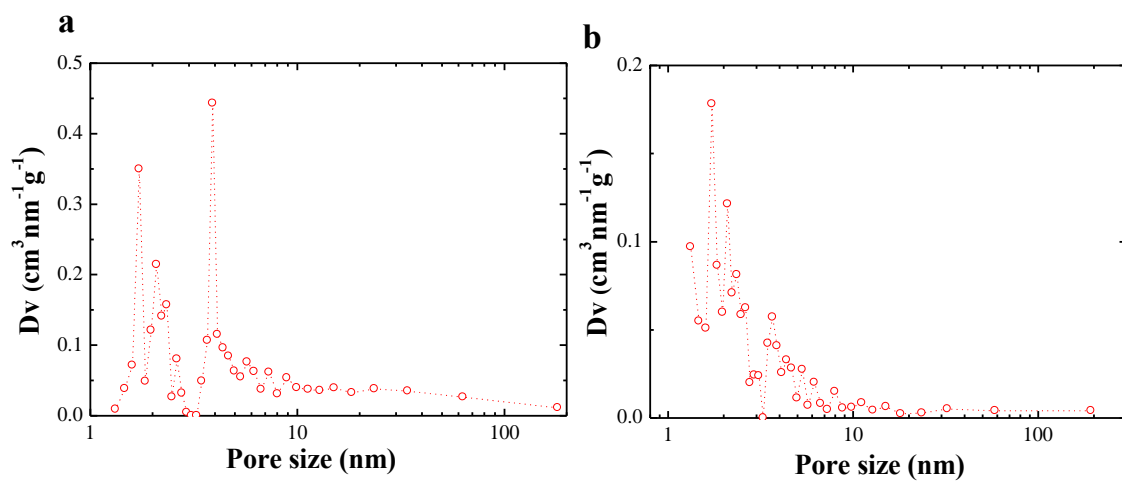

**Supplementary Figure 7: Differential pore volume distribution on rGO-CNs** obtained by Barret-Joyner-Halenda (BJH) method applied to desorption isotherms. a. Additive-free rGO-CNs. The peak at 4 nm results from nitrogen cavitation during the desorption; b. rGO-CNs produced with 1.2 wt% additives.

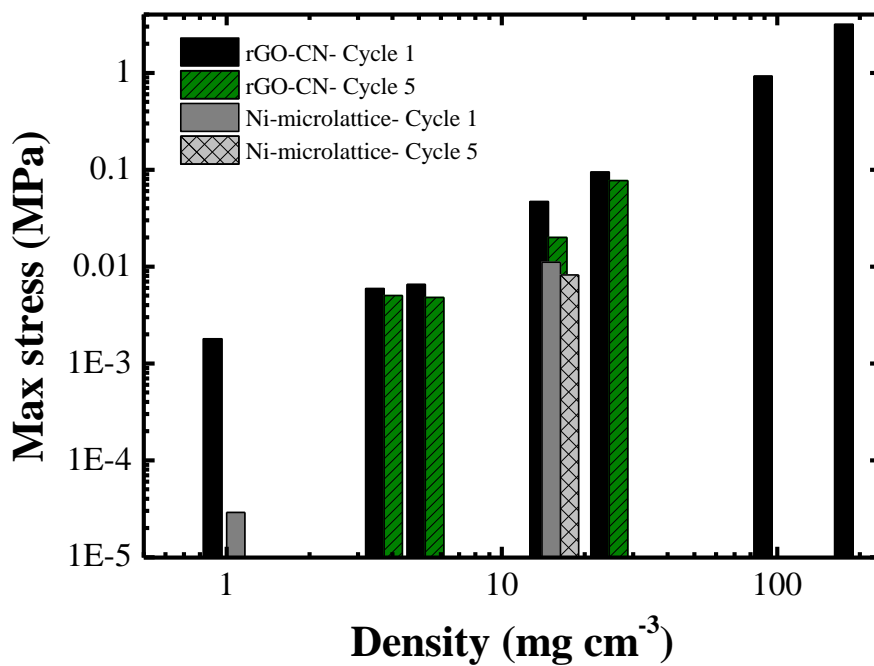

**Supplementary Figure 8: Maximum stress at 50% compression at cycle one and five** (when there is recoverable deformation) for rGO-CNs and Nickel microlattice<sup>26</sup> as a function of material's density. rGO-CNs of different densities produced with 0 to 5 wt% additives and thermal annealed at 300 and 1000 °C.



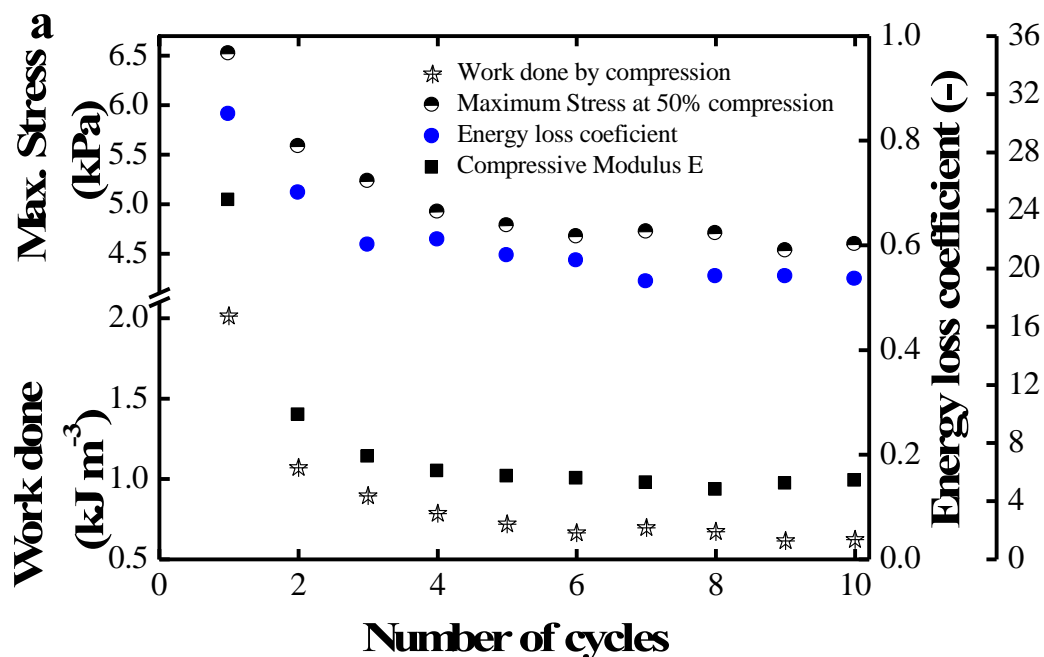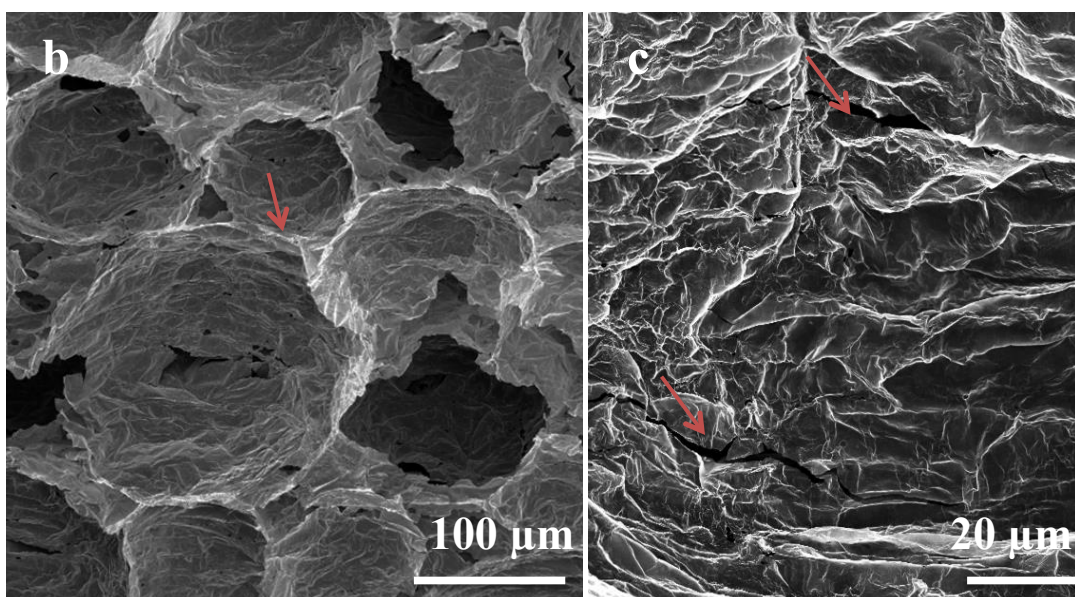

**Supplementary Figure 9: Cycling performance of rGO-CNs ( $6.1 \text{ mg cm}^{-3}$ ) presenting recoverable deformation.**

**a.** History of maximum stress, work done by compression, energy

loss coefficient and compressive modulus E for ten compression cycles at 50% strain. **b-c.** SEM

images of recovered cellular network after it underwent ten compressive cycles. A

microstructural overview showing the recovered cells and intact struts (indicated with the arrow)

efficiently supporting the adjacent cells is shown in **b**. In **c**, rupture paths within the cell walls can

be identified (arrows). They tend to be oriented towards the roughness (wrinkles) present on the

cell wall. rGO-CN produced with 1.2 wt% additives and thermal annealed at  $300 \text{ }^\circ\text{C}$ .



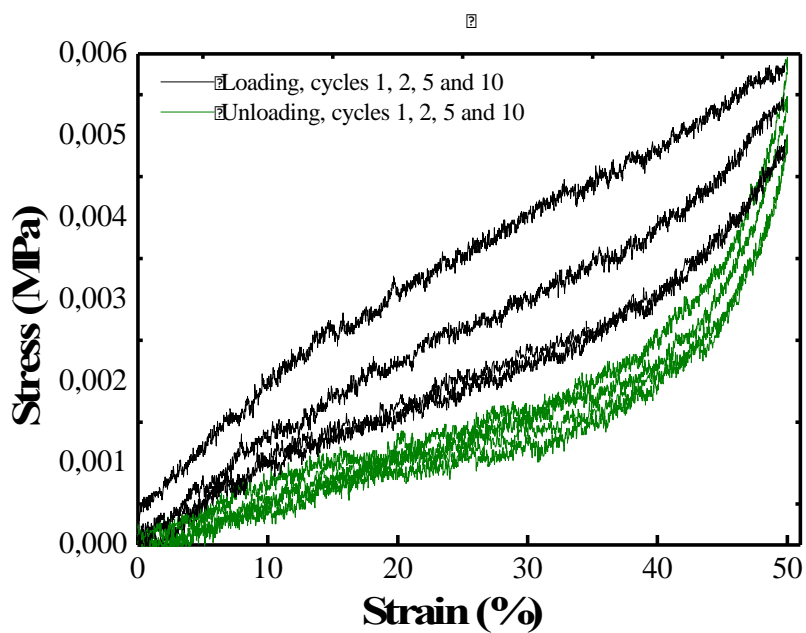

**Supplementary Figure 10: Multicycle compression stress-strain curves of rGO-CN presenting recoverable deformation** of 99 and 97 % after the first and tenth compression cycles. Loading-unloading curves of cycles 1, 2, 5 and 10 for an rGO-CN with  $4.3 \text{ mg cm}^{-3}$ . rGO-CN produced by the addition of 1.2 wt% additives in the GO-sus and annealed at  $950 \text{ }^{\circ}\text{C}$ .
